# Supplementary material for: Antimicrobial Resistance and Molecular Epidemiology of Staphylococcus aureus from Hunters and Hunting Dogs
Source: MDPI journal article supplement (doi:10.3390/pathogens11050548), 2022-05-06
Supplement: s1 [file s1]

# ***Staphylococcus aureus* from hunters and hunting dogs: molecular epidemiological evidence supporting human-to-dog and dog-to-dog transmission**

Vanessa Silva, Manuela Caniça, Vera Manageiro, Madalena Vieira-Pinto, José Eduardo Pereira, Luís Maltez, Patrícia Poeta, Gilberto Igrejas

**Table S1.** Breed, gender, and age of all dogs sampled in this study.

| Hunter    | Dogs  | Breed           | Gender | Age |
|-----------|-------|-----------------|--------|-----|
| Hunter 1  | Dog 1 | Podengo         | F      | 2   |
|           | Dog 2 | Podengo         | M      | 1   |
|           | Dog 3 | Podengo         | M      | 1   |
|           | Dog 4 | Podengo         | M      | 6   |
|           | Dog 5 | Podengo         | M      | 4   |
| Hunter 2  | Dog 1 | Podengo         | M      | 11  |
|           | Dog 2 | Podengo         | M      | 3   |
|           | Dog 3 | Podengo         | M      | 3   |
| Hunter 3  | Dog 1 | Pointer         | F      | 1   |
|           | Dog 2 | Podengo         | F      | 1   |
|           | Dog 3 | Podengo         | F      | 3   |
|           | Dog 4 | French Spaniel  | M      | 1   |
|           | Dog 5 | Podengo         | F      | 3   |
| Hunter 4  | Dog 1 | Crossbreed      | M      | 2   |
|           | Dog 2 | Crossbreed      | M      | 6   |
|           | Dog 3 | Podengo         | M      | 3   |
| Hunter 5  | Dog 1 | Crossbreed      | F      | 5   |
|           | Dog 2 | Podengo         | F      | 8   |
|           | Dog 3 | Podengo         | F      | 5   |
| Hunter 6  | Dog 1 | Épagneul Breton | F      | 6   |
| Hunter 7  | Dog 1 | Welsh Corgi     | M      | 6   |
| Hunter 8  | Dog 1 | Podengo         | M      | 6   |
|           | Dog 2 | Podengo         | M      | 1   |
|           | Dog 3 | Podengo         | F      | 5   |
| Hunter 9  | Dog 1 | Podengo         | M      | 3   |
|           | Dog 2 | Podengo         | M      | 3   |
|           | Dog 3 | Podengo         | M      | 7   |
|           | Dog 4 | Podengo         | F      | 1   |
|           | Dog 5 | Épagneul Breton | M      | 1   |
|           | Dog 6 | Épagneul Breton | F      | 4   |
| Hunter 10 | Dog 1 | Setter          | M      | 2   |
| Hunter 11 | Dog 1 | Podengo         | F      | 4   |
|           | Dog 2 | Podengo         | F      | 9   |

|           |        |                                |   |     |
|-----------|--------|--------------------------------|---|-----|
|           | Dog 3  | Podengo                        | F | 4   |
|           | Dog 1  | Grand Bleu de Gascogne         | M | 9   |
|           | Dog 2  | Grand Bleu de Gascogne         | M | 6   |
|           | Dog 3  | Bayrischer gebirgsschweisshund | M | 2   |
|           | Dog 4  | Grand Bleu de Gascogne         | M | 3   |
|           | Dog 5  | Grand Bleu de Gascogne         | M | 6   |
|           | Dog 6  | Grand Bleu de Gascogne         | F | 2   |
| Hunter 12 | Dog 7  | Grand Bleu de Gascogne         | F | 6   |
|           | Dog 8  | Podengo                        | F | 3   |
|           | Dog 9  | Podengo                        | F | 7   |
|           | Dog 10 | Podengo                        | F | 1   |
|           | Dog 11 | Podengo                        | M | 1   |
|           | Dog 12 | Podengo                        | F | 4   |
|           | Dog 13 | Podengo                        | M | 7   |
|           | Dog 14 | Podengo                        | F | 3   |
|           | Dog 15 | Setter                         | F | 5   |
|           | Dog 16 | Podengo                        | M | 3   |
|           | Dog 17 | Podengo                        | M | 7   |
|           | Dog 18 | Podengo                        | M | 2   |
|           | Dog 19 | Setter                         | M | 2   |
|           | Dog 1  | Crossbreed                     |   | 0.5 |
| Hunter 13 | Dog 2  | Podengo                        |   | 4   |
|           | Dog 3  | Podengo                        |   | 4   |
|           | Dog 4  | Pointer                        |   | 3   |
| Hunter 14 | Dog 1  | Podengo                        | F | 5   |
|           | Dog 2  | Podengo                        | F | 7   |
| Hunter 15 | Dog 1  | Podengo                        | M | 10  |
|           | Dog 2  | Podengo                        | M | 4   |
| Hunter 16 | Dog 1  | Pointer                        | F | 0.5 |
|           | Dog 2  | Pointer                        | F | 0.5 |

|           |       |                           |   |     |
|-----------|-------|---------------------------|---|-----|
|           | Dog 3 | Setter                    | F | 4   |
| Hunter 17 | Dog 1 | Pointer                   | F | 2   |
| Hunter 18 | Dog 1 | Épagneul Breton           | F | 3   |
| Hunter 19 | Dog 1 | Pointer                   | F | 2   |
| Hunter 20 | Dog 1 | Podengo                   | F | 4   |
| Hunter 21 | Dog 1 | Podengo                   | F | 6   |
| Hunter 22 | Dog 1 | Crossbreed                | F | 3   |
| Hunter 23 | Dog 1 | Épagneul Breton           | M | 2   |
| Hunter 24 | Dog 1 | Podengo                   | M | 7   |
| Hunter 25 | Dog 1 | Grand Bleu de<br>Gascogne | F | 3   |
| Hunter 26 | Dog 1 | Podengo                   | M | 0.5 |
| Hunter 27 | Dog 1 | Pointer                   | F | 8   |
| Hunter 28 | Dog 1 | Setter                    | M | 5   |
| Hunter 29 | Dog 1 | Podengo                   | M | 3   |
| Hunter 30 | Dog 1 | Crossbreed                | M | 2   |
